# Supplementary material for: Genetic structure and historical and contemporary gene flow of Astyanaxmexicanus in the Gulf of Mexico slope: a microsatellite-based analysis
Source: PeerJ. 2021 Feb 25;9:e10784. doi: 10.7717/peerj.10784 (PMC7916531; doi:10.7717/peerj.10784)
Supplement: Supplemental Information 9 — Allele sizes of micosatellites loci. [file peerj-09-10784-s009.xlsx]

## Sheet: Hoja1
CODE	SITE	Ast09		Ast10		Ast02		V-c10		A14-d12		W-f6		X-a3		V-f9		L-b9		V-F3
CC1	Cuatrocienegas	180	180	238	238	166	162	255	255	268	262	289	289	209	209	292	288	234	218	216	212
CC2	Cuatrocienegas	180	180	238	238	166	162	255	255	268	268	291	289	209	193	290	284	236	218	212	212
CC3	Cuatrocienegas	180	180	238	238	166	166	255	239	268	262	289	289	193	193	294	288	218	218	212	208
CC4	Cuatrocienegas	180	180	238	238	166	162	255	255	270	266	289	289	209	209	292	286	234	218	212	208
CC5	Cuatrocienegas	180	180	238	236	166	162	255	255	268	264	289	289	209	209	292	288	234	218	216	212
CC6	Cuatrocienegas	184	180	238	238	166	166	255	239	268	262	291	289	209	193	292	292	218	218	208	208
CC7	Cuatrocienegas	184	180	244	238	162	162	255	235	268	268	289	289	209	193	292	292	234	218	216	212
CC8	Cuatrocienegas	184	180	238	238	166	162	239	239	268	268	291	291	209	209	294	286	234	218	212	206
CC9	Cuatrocienegas	184	180	238	238	164	164	255	251	276	272	293	291	209	209	292	286	218	218	208	208
CC10	Cuatrocienegas	180	180	238	238	166	162	255	239	270	264	291	291	213	213	292	288	218	218	212	208
CC11	Cuatrocienegas	186	180	238	238	166	162	251	251	268	268	291	289	205	193	292	288	236	218	212	212
CC12	Cuatrocienegas	180	180	244	238	166	162	255	249	268	264	291	289	209	193	288	288	236	218	212	208
CC13	Cuatrocienegas	184	180	238	238	166	166	249	239	268	268	289	289	211	193	288	288	218	218	208	208
CC14	Cuatrocienegas	180	180	238	238	168	164	239	237	268	264	289	289	209	209	290	284	218	218	208	208
CC15	Cuatrocienegas	180	180	238	238	166	166	255	239	264	264	291	289	213	193	290	284	218	218	214	208
CC16	Cuatrocienegas	184	180	238	238	166	166	255	255	264	264	291	291	209	209	292	286	218	218	212	208
CC17	Cuatrocienegas	184	180	242	238	164	164	255	249	268	268	291	289	209	193	292	286	218	218	212	208
CC18	Cuatrocienegas	184	180	238	238	166	166	255	249	268	268	289	289	209	193	290	278	218	218	216	206
CC19	Cuatrocienegas	182	178	238	238	166	162	249	245	270	264	291	289	209	209	292	286	218	218	208	202
CC20	Cuatrocienegas	180	180	238	238	168	164	255	249	268	268	291	291	205	193	290	290	218	218	212	208
CC21	Cuatrocienegas	180	180	238	238	166	166	249	241	262	262	291	289	193	193	292	292	218	218	216	208
CC22	Cuatrocienegas	180	180	238	236	166	166	255	249	262	262	291	289	209	209	292	292	218	218	212	212
CC23	Cuatrocienegas	180	180	238	238	166	166	249	249	268	260	291	289	211	209	294	290	236	218	216	210
CC24	Cuatrocienegas	184	176	238	238	164	164	255	241	268	262	289	289	209	209	292	288	218	218	216	212
CC25	Cuatrocienegas	176	176	238	238	166	162	0	0	0	0	291	289	211	209	286	286	218	218	208	208
CC26	Cuatrocienegas	186	182	238	238	166	162	255	247	268	262	289	289	211	209	292	286	218	218	212	212
SF1	San Fernando	176	176	238	238	166	166	247	235	268	250	289	289	207	207	278	278	218	216	214	210
SF2	San Fernando	176	176	238	238	166	166	235	235	262	252	309	293	223	207	280	274	220	220	210	204
SF3	San Fernando	176	172	238	238	166	166	247	235	268	262	0	0	209	207	278	274	220	218	214	210
SF4	San Fernando	176	176	246	244	166	166	247	235	268	260	309	295	207	207	290	274	220	216	216	204
SF5	San Fernando	174	166	244	238	180	166	247	235	268	260	289	289	207	207	278	274	218	216	216	210
SF6	San Fernando	176	172	238	238	166	166	251	247	268	250	305	295	211	209	274	274	222	220	216	216
SF7	San Fernando	176	176	238	238	166	166	247	247	266	254	307	299	207	207	280	274	236	220	216	216
SF8	San Fernando	176	172	244	238	166	166	235	235	268	254	295	291	209	209	290	274	220	218	222	214
SF9	San Fernando	176	172	244	244	166	166	247	235	264	260	307	295	207	207	282	278	220	216	216	204
SF10	San Fernando	176	176	238	238	166	166	247	235	274	260	295	295	207	207	280	280	216	216	216	204
SF11	San Fernando	176	172	238	238	166	166	247	235	260	264	295	291	207	207	278	274	220	220	214	214
SF12	San Fernando	176	176	244	226	166	166	239	235	268	260	295	295	209	207	274	274	218	218	216	210
SF13	San Fernando	176	176	246	238	166	166	247	235	268	250	295	295	207	207	278	278	218	218	216	200
SF14	San Fernando	176	176	238	238	186	166	247	239	268	268	295	291	209	207	284	278	220	216	214	214
SF15	San Fernando	176	172	238	238	166	166	247	235	268	260	295	295	205	207	278	278	220	220	216	216
SF16	San Fernando	176	172	238	238	166	166	247	235	272	254	291	287	207	207	278	274	220	216	214	208
SF17	San Fernando	176	176	238	238	166	166	247	239	268	268	295	285	207	207	282	276	220	216	214	204
SF18	San Fernando	176	176	238	238	174	166	247	235	268	264	295	291	207	207	278	278	220	216	216	210
SF19	San Fernando	176	172	238	238	166	166	247	247	262	256	305	289	209	207	278	278	216	216	210	204
SF20	San Fernando	176	176	238	238	166	166	247	235	258	250	295	291	223	209	278	274	220	220	216	200
SF21	San Fernando	176	176	244	238	168	164	255	235	268	250	295	295	207	207	280	274	220	220	214	208
SF22	San Fernando	176	176	238	238	166	166	247	235	262	258	293	293	209	207	280	280	220	216	216	210
SF23	San Fernando	176	176	238	238	174	166	235	235	268	268	299	295	207	207	278	278	218	216	216	216
SF24	San Fernando	176	176	252	244	166	166	235	235	252	252	307	293	207	205	280	274	220	218	214	210
SF25	San Fernando	176	172	238	238	166	166	235	235	250	240	303	303	205	205	280	276	242	216	216	200
SF26	San Fernando	174	166	238	238	166	166	247	235	268	260	293	289	207	205	278	274	220	216	216	210
SF27	San Fernando	176	176	248	238	166	162	245	235	274	250	295	295	207	207	278	278	218	216	216	200
SF28	San Fernando	176	172	238	238	166	166	247	243	266	254	291	291	207	207	278	274	220	218	216	204
SF29	San Fernando	176	176	238	238	166	166	245	239	266	254	295	295	211	209	278	274	218	216	216	200
SF30	San Fernando	176	176	238	238	166	166	247	239	250	250	299	291	209	209	278	274	220	218	222	214
GV1	Garza Valdez	176	172	244	244	204	176	245	245	260	250	307	293	205	205	280	280	228	218	204	200
GV2	Garza Valdez	176	176	256	238	166	166	247	243	250	250	307	293	205	205	278	278	218	218	228	222
GV3	Garza Valdez	176	172	244	240	202	196	251	245	260	250	295	293	213	183	280	276	218	218	210	204
GV4	Garza Valdez	176	172	248	244	176	164	255	247	264	250	307	295	213	199	284	280	220	218	216	204
GV5	Garza Valdez	176	176	246	244	176	176	255	245	262	262	315	295	201	199	284	278	218	218	212	204
GV6	Garza Valdez	176	176	246	244	186	186	249	245	260	250	295	293	203	199	290	284	218	218	204	204
GV7	Garza Valdez	176	172	246	242	186	180	245	245	250	250	295	295	207	203	290	284	218	218	222	214
GV8	Garza Valdez	180	174	248	238	206	168	251	247	260	250	293	283	203	199	278	274	218	218	206	202
GV9	Garza Valdez	176	176	246	244	178	170	255	245	260	260	307	293	199	199	284	284	218	218	204	204
GV10	Garza Valdez	174	168	244	244	190	184	245	245	250	250	311	293	207	203	290	284	218	218	222	214
GV11	Garza Valdez	184	174	248	244	206	186	249	245	264	250	305	293	213	207	284	280	218	218	210	210
GV13	Garza Valdez	176	172	246	244	182	176	245	245	262	260	303	295	199	199	278	278	218	218	210	204
GV14	Garza Valdez	176	176	244	244	174	170	257	249	262	252	311	291	201	201	290	278	218	216	204	204
GV15	Garza Valdez	176	176	246	240	186	166	255	245	262	252	293	289	211	205	284	284	218	218	214	204
GV16	Garza Valdez	176	176	246	244	182	176	253	245	260	260	301	291	209	207	290	284	218	218	206	202
GV17	Garza Valdez	176	172	244	244	184	174	245	239	262	252	295	291	207	199	278	278	218	218	200	200
GV18	Garza Valdez	176	172	244	244	188	182	253	245	252	252	295	289	209	203	284	284	218	216	208	200
GV19	Garza Valdez	176	172	246	230	184	166	255	245	252	252	315	293	209	203	284	278	218	218	204	200
GV20	Garza Valdez	176	176	248	244	188	188	245	235	262	252	303	293	207	201	278	278	218	216	230	204
GV21	Garza Valdez	176	176	248	244	174	166	247	243	252	252	307	303	213	207	284	284	218	216	210	204
GV22	Garza Valdez	178	174	242	230	200	194	249	243	274	260	303	291	199	199	278	278	218	216	204	204
GV23	Garza Valdez	176	176	246	246	206	176	251	245	252	252	301	291	199	199	276	276	218	218	234	226
GV24	Garza Valdez	176	176	246	246	188	184	251	245	262	262	295	291	199	199	278	278	218	218	224	212
GV25	Garza Valdez	176	176	246	246	176	176	245	245	264	252	315	293	207	207	284	278	218	216	210	204
TR1	Troncones	176	172	246	240	188	174	247	243	260	250	307	293	205	205	292	280	216	216	210	200
TR2	Troncones	176	172	246	244	210	180	255	245	260	256	301	293	199	199	280	276	224	216	210	204
TR3	Troncones	176	176	246	244	192	180	253	245	258	258	301	293	213	199	278	278	218	218	204	196
TR4	Troncones	176	172	246	244	188	172	251	247	260	250	301	293	199	199	284	278	218	218	200	200
TR5	Troncones	174	174	250	246	176	176	245	245	258	252	297	297	205	199	290	284	218	218	210	200
TR6	Troncones	180	176	250	246	206	182	253	253	266	250	291	291	209	209	278	278	218	216	204	204
TR7	Troncones	176	172	246	244	174	166	245	245	250	250	305	301	207	199	284	278	218	216	214	204
TR8	Troncones	176	172	246	244	188	166	245	245	258	250	293	289	211	211	278	278	218	216	224	208
TR9	Troncones	176	176	246	244	194	178	245	245	260	256	293	291	211	199	278	278	218	216	210	204
TR10	Troncones	174	174	246	244	188	184	255	245	260	250	309	303	205	205	278	278	218	218	200	200
TR11	Troncones	176	176	246	244	180	176	253	247	260	252	309	291	205	199	280	276	218	216	200	200
TR12	Troncones	176	176	246	244	166	166	253	245	250	250	323	301	205	199	278	278	218	218	204	198
TR13	Troncones	174	174	246	244	182	166	247	243	250	250	311	295	205	199	284	280	218	218	204	200
TR14	Troncones	176	172	246	244	186	174	247	243	268	262	307	293	205	205	278	278	226	216	200	196
TR15	Troncones	174	174	250	246	208	166	245	245	258	250	305	289	201	197	278	278	218	218	204	204
TR16	Troncones	174	174	250	246	188	184	253	245	260	260	309	305	211	207	284	276	218	218	204	204
TR17	Troncones	176	172	246	244	194	174	253	253	268	250	293	285	207	199	278	278	218	216	230	200
TR18	Troncones	176	172	246	244	194	166	247	241	270	250	309	293	199	199	278	278	218	218	210	200
TR19	Troncones	176	176	246	244	188	184	247	243	260	260	303	303	207	205	278	278	218	216	230	204
TR20	Troncones	176	176	246	246	188	172	243	243	258	250	303	291	207	205	294	278	218	218	204	204
TR21	Troncones	176	176	244	244	188	174	249	243	258	250	301	293	205	199	278	278	218	218	234	204
TR22	Troncones	176	172	244	244	172	166	247	243	250	250	303	295	199	199	284	278	218	218	206	202
TR23	Troncones	176	172	246	246	208	172	247	237	250	250	295	291	203	203	292	284	218	218	236	214
TR24	Troncones	176	176	250	246	210	182	247	243	260	250	295	289	201	199	292	284	218	216	210	210
TR25	Troncones	176	172	244	240	208	196	245	245	260	250	303	295	205	205	284	278	218	218	206	198
TR26	Troncones	176	176	238	238	190	182	249	243	262	262	289	289	205	199	278	278	218	218	210	204
TR27	Troncones	176	176	246	244	166	166	245	245	262	250	293	291	207	199	284	278	218	216	204	196
TR28	Troncones	176	176	246	244	166	166	245	245	258	250	303	303	207	201	284	278	218	216	204	198
TR29	Troncones	176	172	248	242	166	166	255	251	252	250	311	289	199	199	280	276	218	218	212	208
TR30	Troncones	174	174	244	244	208	184	245	245	258	250	307	295	203	203	290	280	218	216	222	206
TR31	Troncones	176	176	250	244	210	174	247	243	266	250	303	303	207	207	286	278	218	218	210	196
TR32	Troncones	176	172	252	248	174	166	247	241	262	262	303	291	213	201	284	278	218	218	200	196
TR33	Troncones	176	176	252	248	174	166	245	245	268	250	303	289	207	207	290	278	218	218	204	200
TR34	Troncones	176	164	250	248	206	188	255	251	262	258	303	299	201	199	284	278	218	216	204	204
TR35	Troncones	176	176	246	246	174	166	245	245	262	250	293	291	203	199	278	278	218	218	212	204
TR36	Troncones	174	174	250	244	190	166	245	245	262	250	291	289	207	207	278	278	218	218	210	210
TR37	Troncones	176	176	246	246	188	174	263	245	262	250	303	299	203	201	284	278	218	216	228	200
TR38	Troncones	176	172	244	242	166	166	257	245	264	250	293	289	207	203	284	280	216	216	210	204
TR39	Troncones	176	172	250	244	186	176	245	245	262	252	295	285	211	199	278	278	218	218	218	206
TR40	Troncones	176	170	250	246	178	178	247	243	268	258	295	293	199	199	278	278	218	218	222	210
AL1	Arroyo Lagartos	174	174	238	238	176	170	251	251	256	250	299	291	209	203	290	290	228	228	218	218
AL2	Arroyo Lagartos	174	174	256	256	176	176	251	231	250	250	299	291	209	203	290	290	228	216	218	218
AL5	Arroyo Lagartos	174	164	238	238	168	162	245	245	284	266	299	285	213	201	282	278	232	232	216	212
AL8	Arroyo Lagartos	174	164	254	254	196	172	245	245	260	260	0	0	209	199	292	286	226	216	212	212
AL10	Arroyo Lagartos	174	174	252	238	168	168	243	237	258	250	287	285	209	199	292	278	266	218	0	0
AL11	Arroyo Lagartos	174	174	244	238	196	196	247	241	252	250	299	283	209	201	290	278	226	216	212	206
AL15	Arroyo Lagartos	174	174	256	244	164	164	243	243	250	240	295	293	209	199	290	290	216	216	212	212
AL16	Arroyo Lagartos	174	174	244	238	170	166	247	241	260	254	299	295	207	199	292	286	230	216	212	212
AL17	Arroyo Lagartos	174	174	238	236	172	172	247	235	240	240	299	285	205	205	294	278	218	216	226	212
AL20	Arroyo Lagartos	174	174	254	238	196	196	249	245	266	258	299	293	209	199	294	288	236	218	214	208
AL22	Arroyo Lagartos	174	174	254	244	200	168	251	241	278	260	287	287	209	199	288	288	226	216	216	212
AL23	Arroyo Lagartos	174	174	254	238	168	168	249	245	266	260	299	293	209	199	294	288	236	218	214	208
AL24	Arroyo Lagartos	174	174	238	238	170	166	247	237	264	242	285	281	209	199	288	282	218	216	212	204
AL25	Arroyo Lagartos	174	174	250	238	172	172	243	239	258	252	283	281	205	201	288	282	216	216	216	212
AL26	Arroyo Lagartos	174	174	244	242	182	170	259	243	242	242	283	277	209	207	292	276	232	216	0	0
AL27	Arroyo Lagartos	174	174	244	238	162	162	243	243	258	252	297	283	207	199	0	0	226	226	216	212
AL31	Arroyo Lagartos	174	164	248	238	168	168	243	239	250	250	285	281	209	205	294	278	216	216	216	212
AL32	Arroyo Lagartos	174	164	252	244	168	168	249	231	254	250	287	281	207	199	292	284	232	216	214	208
AL33	Arroyo Lagartos	182	172	238	238	172	172	245	245	252	250	295	283	209	205	288	288	218	216	214	208
AL34	Arroyo Lagartos	174	174	256	246	170	170	243	243	278	264	299	283	203	199	288	278	232	220	216	210
AL35	Arroyo Lagartos	186	174	238	238	178	178	245	245	250	250	295	283	209	199	288	288	218	216	216	216
AL36	Arroyo Lagartos	174	174	244	238	170	160	243	237	278	264	299	285	209	199	288	278	220	218	216	216
AL37	Arroyo Lagartos	174	164	256	238	164	164	233	233	250	240	293	293	211	199	286	282	216	214	212	212
AL38	Arroyo Lagartos	190	174	238	238	178	178	247	247	282	250	293	287	209	199	288	288	218	216	216	216
AL39	Arroyo Lagartos	174	174	244	238	170	166	243	237	278	264	299	285	209	199	288	278	220	218	216	216
AL40	Arroyo Lagartos	174	164	256	238	164	164	231	231	250	240	293	293	211	199	286	282	218	218	212	212
AL41	Arroyo Lagartos	174	164	244	238	170	170	249	243	284	250	299	287	209	199	290	286	232	218	216	216
AL42	Arroyo Lagartos	174	174	252	238	194	190	249	249	254	250	299	287	209	207	292	284	232	218	214	214
AL43	Arroyo Lagartos	166	164	252	248	164	164	245	245	268	262	295	287	207	201	292	282	218	218	212	204
AL44	Arroyo Lagartos	174	164	252	244	168	168	249	231	262	250	287	281	207	199	292	284	232	216	214	210
AL45	Arroyo Lagartos	174	174	242	236	172	162	249	241	250	242	299	281	209	201	288	284	226	216	236	212
AL46	Arroyo Lagartos	174	164	238	238	184	184	249	241	262	242	293	287	209	199	284	278	230	218	212	212
AL47	Arroyo Lagartos	174	174	246	246	196	168	245	231	260	250	299	287	199	199	284	280	218	216	216	208
AL48	Arroyo Lagartos	174	164	250	238	174	168	249	245	280	258	299	287	211	203	280	280	236	236	212	212
AL49	Arroyo Lagartos	174	174	238	238	180	170	245	245	250	250	287	281	209	199	292	280	226	218	212	212
AL50	Arroyo Lagartos	174	174	252	238	194	170	249	245	258	250	295	285	211	199	292	280	232	218	212	208
ML1	Cueva Molino	176	176	256	256	168	168	251	251	250	250	297	297	199	199	292	288	218	218	212	212
ML2	Cueva Molino	176	176	256	256	174	168	251	251	250	250	297	297	199	199	290	290	218	218	212	212
ML3	Cueva Molino	176	176	256	256	168	168	251	251	250	250	297	297	199	199	290	290	218	218	212	212
ML4	Cueva Molino	176	176	256	256	168	168	251	251	250	250	297	297	199	199	290	290	218	218	212	212
ML5	Cueva Molino	176	176	256	256	168	168	251	251	250	250	297	297	199	199	290	290	218	218	212	212
ML6	Cueva Molino	176	176	256	256	168	168	251	251	250	250	297	297	199	199	290	290	218	218	212	212
ML7	Cueva Molino	176	176	256	256	168	168	251	251	250	250	297	297	199	199	290	290	218	218	212	212
ML8	Cueva Molino	176	176	256	256	168	168	251	251	250	250	297	297	199	199	292	288	218	218	212	212
ML9	Cueva Molino	176	176	256	256	168	168	251	251	250	250	297	297	199	199	290	290	218	218	212	212
ML10	Cueva Molino	176	176	256	256	168	168	251	251	250	250	297	297	199	199	290	290	218	218	212	212
ML11	Cueva Molino	176	176	256	256	168	168	251	251	250	250	297	297	199	199	292	288	218	218	212	212
ML12	Cueva Molino	176	176	256	256	168	168	251	251	250	250	297	297	199	199	290	290	218	218	212	212
ML13	Cueva Molino	176	176	256	256	168	168	251	251	250	250	297	297	199	199	292	288	218	218	212	212
ML14	Cueva Molino	176	176	256	256	168	168	251	251	250	250	297	297	199	199	290	290	218	218	212	212
ML15	Cueva Molino	176	176	256	256	168	168	251	251	250	250	297	297	199	199	290	290	218	218	212	212
PCH1	Cueva Pachon	174	174	254	254	176	176	251	251	250	250	293	293	209	203	290	278	228	228	218	218
PCH2	Cueva Pachon	174	174	254	254	176	176	251	251	250	250	293	293	203	203	290	286	228	228	218	218
PCH3	Cueva Pachon	174	174	254	254	176	176	251	251	250	250	293	293	207	203	288	288	228	228	218	218
PCH4	Cueva Pachon	174	174	254	254	176	176	251	251	250	250	293	293	203	203	288	278	228	228	218	218
PCH5	Cueva Pachon	174	174	254	254	176	176	251	251	250	250	293	293	203	203	288	288	228	228	218	218
PCH6	Cueva Pachon	174	174	254	254	176	176	251	251	250	250	293	293	203	203	290	286	228	228	218	218
PCH7	Cueva Pachon	174	174	254	254	176	170	251	251	250	250	293	293	203	203	288	288	228	228	218	218
PCH8	Cueva Pachon	174	174	254	254	176	176	251	251	250	250	293	293	203	203	288	278	228	216	218	218
PCH9	Cueva Pachon	174	174	254	254	176	170	251	247	250	250	293	293	203	203	288	288	228	228	218	218
PCH10	Cueva Pachon	174	174	254	254	176	176	251	251	250	250	293	293	203	203	288	288	228	228	218	218
PCH11	Cueva Pachon	174	174	254	254	176	176	251	251	250	250	293	293	203	203	288	288	228	228	218	218
PCH12	Cueva Pachon	174	174	254	254	176	176	251	251	250	250	293	293	203	203	288	288	228	228	218	218
PCH13	Cueva Pachon	174	174	254	254	176	176	251	251	250	250	293	293	209	203	290	286	228	216	218	218
PCH14	Cueva Pachon	174	174	254	238	176	176	251	251	250	250	293	293	209	203	288	288	228	216	218	218
PCH15	Cueva Pachon	174	174	254	254	176	176	251	251	250	250	293	293	209	203	288	288	228	228	218	218
PCH16	Cueva Pachon	174	174	254	254	176	170	251	247	250	250	293	293	209	203	288	288	228	228	218	218
PCH17	Cueva Pachon	174	174	254	254	176	176	251	231	256	250	293	293	203	203	288	288	228	216	218	218
PCH18	Cueva Pachon	174	174	254	254	176	176	251	251	250	250	293	293	203	203	288	288	228	228	218	218
PCH19	Cueva Pachon	174	174	254	254	176	176	251	231	250	250	293	293	209	203	288	288	228	216	218	218
PCH20	Cueva Pachon	174	174	254	254	176	176	251	247	250	250	293	293	207	203	288	288	228	228	218	218
PCH21	Cueva Pachon	174	174	254	254	176	170	251	247	250	250	293	293	207	203	288	288	228	228	218	218
PCH22	Cueva Pachon	174	174	254	254	176	176	251	251	250	250	293	293	203	203	288	288	228	228	218	218
PCH23	Cueva Pachon	174	174	254	254	176	176	251	251	250	250	293	293	203	203	288	288	228	216	218	218
PCH24	Cueva Pachon	174	174	254	254	176	176	251	251	250	250	293	293	203	203	288	288	228	228	218	218
PCH25	Cueva Pachon	174	174	254	254	176	170	251	251	250	250	293	293	203	203	288	288	228	228	218	218
PCH26	Cueva Pachon	174	174	254	254	176	176	251	251	250	250	293	293	209	209	288	288	228	228	218	218
PCH27	Cueva Pachon	174	174	254	254	176	176	251	251	250	250	293	293	209	203	288	288	228	216	218	218
PCH28	Cueva Pachon	174	174	254	254	176	176	251	251	250	250	293	293	209	203	290	286	228	228	218	218
PCH29	Cueva Pachon	174	174	254	254	176	176	251	247	250	250	293	293	203	203	288	288	228	228	218	218
PCH30	Cueva Pachon	174	174	254	254	176	170	251	251	250	250	293	293	203	203	288	288	228	228	218	218
PCH31	Cueva Pachon	174	174	254	254	176	176	251	251	250	250	293	293	209	203	288	288	228	228	218	218
PCH32	Cueva Pachon	174	174	254	238	176	176	251	251	250	250	293	293	209	203	290	286	228	228	218	218
PCH33	Cueva Pachon	174	174	254	254	176	176	251	251	250	250	293	293	209	203	288	288	228	216	218	218
PCH34	Cueva Pachon	174	174	254	254	176	176	251	251	250	250	293	293	203	203	288	288	228	216	218	218
PCH35	Cueva Pachon	174	174	254	254	176	170	251	251	250	250	293	293	203	203	288	288	228	228	218	218
PCH36	Cueva Pachon	174	174	254	254	176	176	251	251	250	250	293	293	203	203	288	288	228	228	218	218
PCH37	Cueva Pachon	174	174	254	254	176	176	251	251	250	250	293	293	203	203	290	286	228	228	218	218
PCH38	Cueva Pachon	174	174	254	238	176	176	251	251	250	250	293	293	209	203	288	288	228	216	218	218
PCH39	Cueva Pachon	174	174	254	254	176	176	249	231	250	250	293	293	209	209	288	288	228	228	218	218
PCH40	Cueva Pachon	174	174	254	238	176	176	251	251	250	250	293	293	209	209	288	288	228	228	218	218
PCH41	Cueva Pachon	174	174	254	254	176	176	251	251	250	250	293	293	203	203	288	288	228	228	218	218
PCH42	Cueva Pachon	174	174	254	254	176	176	251	251	250	250	293	293	203	203	288	288	228	228	218	218
PCH43	Cueva Pachon	174	174	254	254	176	176	251	251	256	256	293	293	203	203	288	278	228	228	218	218
PCH44	Cueva Pachon	174	174	254	254	176	176	251	251	250	250	293	293	203	203	288	288	228	228	218	218
SAB1	Cueva Sabinos	174	174	248	248	178	174	247	247	260	258	287	287	205	205	290	290	228	228	218	218
SAB2	Cueva Sabinos	174	174	248	248	176	176	247	247	260	258	287	287	205	205	292	286	218	218	216	216
SAB3	Cueva Sabinos	174	174	248	248	176	176	247	247	258	258	287	287	205	205	292	286	228	218	216	216
SAB4	Cueva Sabinos	174	174	248	248	176	176	247	247	260	258	287	287	205	205	290	290	228	228	216	216
SAB5	Cueva Sabinos	174	174	236	236	176	176	247	247	258	258	287	287	205	205	290	290	228	218	216	216
SAB6	Cueva Sabinos	174	174	236	236	176	176	247	247	258	258	287	287	205	205	290	290	228	218	216	216
SAB7	Cueva Sabinos	174	174	248	248	178	174	247	247	258	258	287	287	211	205	290	290	228	218	216	216
SAB8	Cueva Sabinos	174	174	248	248	176	176	247	247	258	258	287	287	205	205	292	286	228	216	216	216
SAB9	Cueva Sabinos	174	174	248	248	176	176	247	247	258	258	287	287	205	205	292	286	228	218	216	216
SAB10	Cueva Sabinos	174	174	248	248	178	174	247	247	258	258	287	287	205	205	290	290	228	218	216	216
SAB11	Cueva Sabinos	174	174	236	236	176	176	247	247	258	258	287	287	205	205	290	290	218	216	216	216
SAB12	Cueva Sabinos	174	174	248	248	176	176	247	247	258	258	287	287	205	205	290	290	228	218	216	216
SAB14	Cueva Sabinos	174	174	248	248	176	176	247	247	258	258	287	287	205	205	292	286	218	218	216	216
SAB15	Cueva Sabinos	174	174	252	238	178	174	0	0	0	0	287	287	205	205	290	290	218	216	216	216
SAB16	Cueva Sabinos	174	174	236	236	178	178	247	247	258	258	287	287	205	205	292	292	228	218	216	216
SAB17	Cueva Sabinos	174	174	248	248	176	176	247	247	260	258	287	287	205	205	292	286	228	228	216	216
SAB18	Cueva Sabinos	174	174	248	248	178	174	247	247	258	258	287	287	205	203	290	290	228	228	216	216
SAB19	Cueva Sabinos	174	174	248	236	178	174	247	247	258	258	287	287	205	205	290	290	228	218	216	216
SAB20	Cueva Sabinos	174	174	248	248	178	174	247	247	258	258	287	287	205	205	292	286	228	228	216	216
SAB21	Cueva Sabinos	174	174	248	248	176	176	247	247	258	258	287	287	205	205	292	286	218	218	216	216
SAB22	Cueva Sabinos	174	174	248	248	176	176	247	247	258	258	287	287	205	205	290	290	218	218	216	216
SAB23	Cueva Sabinos	174	174	248	248	176	176	247	247	258	258	287	287	205	207	292	292	228	218	216	216
SAB24	Cueva Sabinos	174	174	248	248	176	176	247	247	258	258	287	287	205	205	290	290	228	218	216	216
TIN1	Cueva Tinajas	174	174	248	248	178	174	247	247	258	256	287	287	207	205	290	290	228	216	216	216
TIN2	Cueva Tinajas	174	174	248	248	178	174	247	247	256	256	287	287	207	207	290	290	218	216	216	216
TIN3	Cueva Tinajas	174	174	248	248	178	174	247	247	256	256	287	287	199	199	290	290	228	216	216	216
TIN4	Cueva Tinajas	174	174	248	244	174	174	247	247	258	256	287	287	213	207	290	290	218	216	216	216
TIN5	Cueva Tinajas	174	174	252	238	178	174	247	247	256	256	287	287	205	205	290	290	218	216	216	216
TIN6	Cueva Tinajas	174	174	248	238	174	174	247	247	256	256	287	287	205	205	290	290	218	216	216	216
TIN7	Cueva Tinajas	174	174	248	248	178	174	247	247	256	256	287	287	205	205	290	290	228	216	216	216
TIN8	Cueva Tinajas	174	174	0	0	178	178	247	247	258	258	287	287	203	199	290	290	228	216	216	216
TIN9	Cueva Tinajas	174	174	248	248	182	178	247	247	256	256	287	287	205	205	292	292	218	218	216	216
TIN10	Cueva Tinajas	174	174	248	248	180	180	247	247	256	256	287	287	203	203	292	286	218	218	216	216
TIN19	Cueva Tinajas	174	174	248	248	178	178	247	247	258	256	287	287	203	199	292	292	228	216	216	216
TIN22	Cueva Tinajas	174	174	248	248	178	178	247	247	258	256	287	287	205	199	290	290	228	216	216	216
LCA1	La Cañada	176	172	240	240	194	178	243	237	252	252	289	285	203	203	292	288	232	232	216	208
LCA2	La Cañada	174	174	240	236	200	194	243	237	250	250	283	283	203	203	286	280	216	216	202	202
LCA3	La Cañada	176	172	240	240	168	168	249	245	252	250	283	283	199	195	286	278	230	230	214	202
LCA4	La Cañada	176	172	238	238	176	166	249	243	264	250	283	283	199	195	280	280	234	232	216	208
LCA5	La Cañada	176	172	238	238	194	160	253	241	266	250	295	285	201	199	288	288	216	216	218	208
LCA6	La Cañada	174	160	242	238	170	162	261	245	266	266	303	287	199	199	288	278	218	218	216	208
LCA7	La Cañada	174	174	238	238	196	160	247	235	268	266	287	283	205	199	290	282	232	216	220	200
LCA8	La Cañada	176	172	242	238	178	174	265	245	250	250	283	281	209	201	292	284	232	218	214	206
LCA9	La Cañada	174	160	242	238	202	168	253	247	264	250	299	283	209	199	282	278	226	224	220	214
LCA10	La Cañada	174	160	242	238	174	170	261	245	250	250	283	283	201	193	290	280	230	230	208	200
LCA11	La Cañada	174	174	242	240	174	174	245	241	266	266	293	283	211	201	290	280	224	218	208	208
LCA12	La Cañada	174	174	238	236	184	174	263	237	268	250	297	283	201	199	290	280	230	230	214	208
LCA13	La Cañada	176	172	240	238	168	164	247	239	266	250	283	283	201	201	290	284	234	216	216	210
LCA14	La Cañada	174	174	238	236	178	174	247	239	264	250	299	283	199	191	282	280	224	216	208	208
LCA15	La Cañada	176	160	238	238	170	166	261	255	252	250	283	283	203	195	290	280	224	216	208	202
LCA16	La Cañada	174	174	238	238	170	162	263	243	252	250	299	291	201	199	292	280	224	216	218	212
LCA17	La Cañada	174	174	238	238	184	162	263	257	266	250	289	283	201	199	290	288	220	216	216	210
LCA18	La Cañada	174	174	238	238	162	162	247	247	264	250	299	283	201	199	288	282	220	216	216	210
LCA19	La Cañada	174	160	242	238	174	174	257	247	266	250	283	281	201	195	290	282	216	216	216	210
LCA20	La Cañada	174	174	240	238	172	162	243	237	254	250	299	283	211	197	288	284	216	216	224	212
LCA21	La Cañada	176	172	238	238	184	174	265	237	250	248	297	285	201	201	296	282	222	216	216	206
LCA22	La Cañada	174	174	238	238	166	166	249	235	266	258	283	283	197	197	282	280	220	216	214	214
LCA23	La Cañada	174	166	238	238	198	178	255	245	264	250	291	283	203	201	280	278	220	216	216	202
LCA24	La Cañada	174	174	238	238	170	170	263	243	250	250	309	283	205	201	288	278	226	222	214	202
LCA25	La Cañada	174	160	242	238	176	162	263	247	252	250	299	283	203	199	288	288	222	216	214	206
LCA26	La Cañada	174	174	238	238	182	172	261	243	266	252	285	283	201	199	288	278	222	216	214	208
SLP1	Huchihuayan	174	164	244	238	168	164	247	243	270	266	293	291	203	197	290	280	216	216	214	210
SLP2	Huchihuayan	174	174	244	244	172	162	247	247	264	256	305	285	211	203	296	280	218	216	208	208
SLP3	Huchihuayan	174	174	238	238	180	168	247	247	282	250	301	287	203	195	282	278	218	216	214	214
SLP4	Huchihuayan	174	162	244	244	180	172	245	237	260	256	291	283	207	195	286	280	216	216	214	208
SLP5	Huchihuayan	164	164	240	238	182	172	249	245	258	250	299	295	211	205	294	294	218	216	220	212
SLP6	Huchihuayan	164	164	256	224	184	178	245	241	260	248	291	291	197	195	296	282	218	216	214	208
SLP7	Huchihuayan	174	164	244	238	194	172	249	245	266	250	293	293	209	205	292	282	220	216	212	212
SLP8	Huchihuayan	174	164	242	242	182	172	245	245	264	250	301	293	209	199	282	282	216	216	214	208
SLP9	Huchihuayan	174	162	244	240	194	178	245	241	266	256	287	285	197	195	282	282	228	216	212	212
SLP10	Huchihuayan	174	164	256	236	162	162	245	237	252	252	293	287	207	195	286	282	216	216	222	210
SLP11	Huchihuayan	174	174	248	244	162	162	249	241	258	258	295	275	211	209	294	290	220	216	208	202
SLP12	Huchihuayan	176	176	250	244	172	172	249	243	258	254	293	287	205	205	292	288	232	218	214	208
SLP13	Huchihuayan	174	164	252	252	170	166	247	243	270	256	295	293	209	205	284	280	216	216	212	212
SLP14	Huchihuayan	174	164	240	236	194	168	249	243	264	246	295	295	201	197	292	288	222	216	214	208
SLP15	Huchihuayan	176	176	248	236	172	162	245	237	286	256	297	287	207	203	290	280	218	218	214	208
SLP16	Huchihuayan	176	164	244	238	162	162	241	241	258	258	285	283	207	197	280	280	216	216	212	206
SLP17	Huchihuayan	176	164	238	238	180	166	243	237	284	260	297	293	207	201	282	278	218	216	210	204
SLP18	Huchihuayan	174	174	244	238	168	168	247	247	264	260	293	293	207	203	294	288	226	216	220	214
SLP20	Huchihuayan	176	164	244	238	170	160	249	249	258	258	295	293	197	195	292	292	216	216	210	210
V1	El Zapotal	174	174	224	224	174	174	247	243	262	252	289	283	197	191	278	274	230	228	228	210
V2	El Zapotal	174	170	224	224	176	172	257	247	262	254	291	281	199	197	278	274	216	216	214	210
V3	El Zapotal	174	174	224	224	180	180	247	231	260	256	293	289	197	195	284	280	220	218	220	206
V4	El Zapotal	174	164	242	224	174	166	249	245	264	260	293	281	207	205	290	282	220	216	220	212
V5	El Zapotal	174	164	242	224	172	166	257	247	256	254	297	291	197	195	278	274	220	220	210	206
V6	El Zapotal	174	164	238	224	174	170	231	231	260	256	293	285	207	191	278	274	220	216	212	212
V7	El Zapotal	174	170	242	224	188	166	253	243	262	262	289	285	211	199	290	274	220	216	240	212
V8	El Zapotal	174	170	224	224	168	168	245	241	260	252	297	289	197	195	284	280	220	220	204	198
V9	El Zapotal	174	170	224	224	174	164	245	221	260	252	293	285	195	195	284	284	216	216	228	216
V10	El Zapotal	174	174	224	224	180	174	247	243	260	260	285	277	197	195	290	278	234	220	210	204
V11	El Zapotal	174	174	224	224	176	172	243	243	260	260	285	277	203	203	284	274	234	216	220	214
V12	El Zapotal	174	174	244	224	174	174	251	223	262	256	297	293	203	203	290	284	216	216	218	212
V13	El Zapotal	174	174	224	224	174	166	257	245	262	262	293	283	201	199	284	280	228	216	210	210
V14	El Zapotal	174	170	224	224	170	166	257	245	268	254	293	283	199	199	284	284	222	216	212	206
V15	El Zapotal	174	164	224	224	166	166	243	243	266	262	283	283	199	197	284	284	222	216	216	210
V16	El Zapotal	174	174	224	224	174	174	245	237	258	254	283	277	209	203	290	284	218	218	216	202
V17	El Zapotal	174	170	224	224	166	166	243	233	260	260	283	283	195	195	284	284	220	216	208	202
V18	El Zapotal	174	170	232	224	170	170	247	231	260	254	291	291	197	195	286	280	218	216	212	212
V19	El Zapotal	174	174	238	238	174	166	247	233	268	252	291	275	205	195	290	288	216	216	218	212
V20	El Zapotal	174	174	224	224	180	164	233	233	258	258	309	283	211	197	290	288	222	220	218	212
V21	El Zapotal	174	164	238	224	178	174	247	243	264	256	297	283	213	195	286	274	216	216	216	210
V22	El Zapotal	174	170	224	224	174	170	247	243	260	260	293	283	213	207	282	280	222	222	218	212
V23	El Zapotal	174	164	224	224	174	174	257	247	260	260	295	285	207	199	284	280	232	222	220	212
V24	El Zapotal	174	164	224	224	174	174	247	247	264	264	301	283	205	197	282	280	218	216	216	210
V25	El Zapotal	174	174	224	224	174	174	251	247	260	256	283	279	207	205	282	280	216	216	218	212
V26	El Zapotal	174	174	224	224	174	168	247	233	260	254	281	281	195	189	282	278	230	222	212	206
V27	El Zapotal	174	174	224	224	174	174	249	249	264	260	283	281	205	199	282	278	232	226	212	202
V28	El Zapotal	174	164	224	224	180	166	257	247	260	252	291	277	205	199	282	282	232	216	216	210
V29	El Zapotal	174	164	224	224	188	168	257	257	260	260	283	283	203	203	282	278	232	226	212	212
V30	El Zapotal	174	164	224	224	168	168	0	0	260	260	293	281	201	199	284	280	226	222	212	202
CAT1	Lago Catemaco	176	176	246	246	174	164	255	241	260	256	293	289	195	195	286	286	222	218	206	206
CAT2	Lago Catemaco	176	176	258	244	174	168	269	243	264	252	293	287	201	201	290	284	228	228	206	206
CAT3	Lago Catemaco	176	176	250	238	174	174	245	239	256	256	293	281	201	201	296	288	218	218	206	206
CAT4	Lago Catemaco	176	172	256	256	170	164	245	241	262	252	311	289	195	195	284	284	228	222	226	218
CAT5	Lago Catemaco	176	172	244	244	174	170	235	235	260	254	297	281	199	195	286	280	222	218	206	200
CAT6	Lago Catemaco	176	172	250	246	202	176	241	235	258	258	311	305	201	199	288	288	234	230	222	208
CAT7	Lago Catemaco	178	174	244	242	184	174	243	237	254	240	297	291	205	199	296	286	222	218	200	200
CAT8	Lago Catemaco	178	174	256	244	186	172	247	245	264	248	299	285	199	203	286	286	222	218	200	200
CAT9	Lago Catemaco	176	176	258	258	176	172	243	239	262	248	293	289	205	203	288	284	218	218	218	218
CAT10	Lago Catemaco	176	176	246	246	188	174	243	239	254	248	291	281	201	199	288	282	240	222	208	200
CAT11	Lago Catemaco	176	172	250	250	180	174	243	235	262	248	297	287	199	195	288	288	228	222	196	196
CAT12	Lago Catemaco	178	174	250	250	174	170	247	243	270	262	287	281	201	197	296	284	234	216	208	208
CAT13	Lago Catemaco	176	176	244	238	174	162	243	235	262	242	291	291	199	195	288	282	222	216	226	226
CAT14	Lago Catemaco	176	176	246	238	194	174	255	243	260	252	297	293	199	199	284	284	228	218	226	220
CAT15	Lago Catemaco	176	172	248	248	174	170	243	243	260	248	291	285	201	195	288	288	226	222	218	208
CAT16	Lago Catemaco	176	176	252	238	204	162	247	243	262	248	295	287	199	199	292	282	228	222	226	220
CAT17	Lago Catemaco	176	172	246	244	180	174	243	237	262	262	289	289	199	195	290	284	222	222	226	206
CAT18	Lago Catemaco	176	176	250	244	190	180	249	239	250	248	289	289	199	199	284	284	222	222	220	204
CAT19	Lago Catemaco	176	176	248	248	174	174	261	239	262	262	291	287	201	199	288	282	228	226	198	198
CAT20	Lago Catemaco	176	176	252	250	178	170	245	241	264	260	293	285	203	201	290	286	226	214	220	214
CAT21	Lago Catemaco	176	176	246	244	174	170	249	243	264	258	291	283	205	203	286	280	222	222	212	204
CAT22	Lago Catemaco	176	172	254	250	204	162	245	231	250	242	289	279	199	195	290	284	240	232	216	200
CAT23	Lago Catemaco	176	176	252	240	186	166	263	243	258	248	303	297	197	195	286	286	222	218	226	220
CAT24	Lago Catemaco	178	174	250	246	198	164	261	243	260	248	291	285	201	199	290	286	222	218	208	208
CAT25	Lago Catemaco	176	176	246	246	176	176	245	241	248	242	291	285	197	197	286	284	228	222	212	192
CAT26	Lago Catemaco	176	176	252	252	184	168	243	235	262	260	287	287	203	199	290	284	222	216	206	198
TE1	Teapa	182	178	254	238	196	156	249	239	268	248	301	301	195	191	288	286	228	216	216	210
TE2	Teapa	182	178	238	238	174	168	245	245	264	258	287	285	201	197	280	274	218	216	214	202
TE3	Teapa	184	168	250	236	176	170	251	237	264	258	289	285	199	197	292	284	224	216	206	200
TE4	Teapa	180	164	238	238	180	170	249	241	266	260	289	285	195	191	282	278	236	216	210	200
TE5	Teapa	184	180	238	238	176	172	251	243	264	258	291	285	201	197	280	274	228	228	216	204
TE6	Teapa	182	174	238	236	168	160	251	251	272	260	287	277	195	195	290	284	228	214	216	204
TE7	Teapa	176	172	240	240	162	162	253	243	270	260	291	287	201	197	288	284	216	216	214	208
TE8	Teapa	180	176	240	238	178	156	251	239	268	264	307	297	199	197	288	288	228	220	214	208
TE9	Teapa	178	174	238	238	164	160	241	241	274	270	289	285	197	195	288	284	226	226	214	208
TE10	Teapa	174	174	238	238	176	162	253	239	250	248	293	285	201	197	286	274	232	224	222	210
TE11	Teapa	174	162	238	238	178	174	243	243	264	258	291	283	203	201	288	288	234	216	210	206
TE12	Teapa	174	174	238	238	180	170	263	227	274	264	307	305	197	195	288	284	216	216	210	210
TE13	Teapa	176	176	238	238	176	166	255	247	268	260	293	285	207	195	280	274	232	226	212	206
TE14	Teapa	182	174	238	236	180	162	255	245	262	248	289	283	195	189	294	280	232	232	214	210
TE15	Teapa	176	172	238	236	176	168	255	243	262	262	285	283	201	195	284	274	228	224	214	210
TE16	Teapa	182	174	246	238	172	168	251	245	266	262	309	285	211	195	288	284	250	226	214	214
TE17	Teapa	180	176	248	238	182	172	241	241	266	262	301	289	197	197	294	274	226	224	214	198
TE18	Teapa	180	162	244	238	168	162	249	245	264	260	285	285	205	205	284	274	228	226	216	204
TE19	Teapa	176	176	242	238	204	174	251	239	264	258	299	293	201	201	286	282	232	232	216	212
TE20	Teapa	176	172	238	234	180	166	253	243	262	258	293	285	201	193	292	286	226	224	218	218
TE21	Teapa	176	176	248	244	176	170	251	243	266	256	309	283	193	189	288	276	232	232	206	206
TE22	Teapa	176	174	238	236	168	164	249	245	266	260	301	293	201	195	296	282	228	218	212	212
TE23	Teapa	176	172	242	238	172	168	243	239	264	250	305	283	203	201	302	276	232	230	222	212
TE24	Teapa	178	162	238	238	176	156	239	235	262	262	285	283	209	199	280	276	232	222	212	208
TE25	Teapa	184	174	238	238	184	164	251	243	262	258	289	285	199	197	292	286	218	218	214	206
TE26	Teapa	176	176	244	238	168	162	247	239	264	264	303	293	197	197	306	290	240	224	224	214
TE27	Teapa	180	170	238	238	172	172	259	241	278	262	291	283	205	195	286	286	226	222	212	208
TE28	Teapa	176	176	238	238	176	160	247	243	270	248	287	285	197	197	288	274	226	218	212	208
TE29	Teapa	174	174	238	234	174	162	239	231	270	266	291	277	201	197	290	284	216	216	210	202
TE30	Teapa	184	176	244	240	174	168	241	241	250	246	309	305	199	197	296	290	218	216	216	212
TE31	Teapa	180	174	242	238	182	172	243	239	266	264	307	285	197	191	288	288	226	218	214	210
TE32	Teapa	182	176	238	238	174	168	241	237	274	268	301	287	197	197	290	286	228	226	212	202
TE33	Teapa	184	176	238	238	178	168	235	235	268	256	305	301	199	199	280	276	232	232	214	210
TE34	Teapa	178	174	242	240	170	170	241	241	262	262	299	289	197	189	294	294	232	216	208	204
TE35	Teapa	182	176	238	238	186	166	247	241	260	256	287	285	197	189	294	288	236	230	214	210
TE36	Teapa	174	162	238	238	170	170	245	245	264	260	285	283	197	195	288	288	238	218	214	208
TE37	Teapa	180	176	240	238	194	186	247	243	268	260	285	277	203	189	276	276	224	222	210	202
TE38	Teapa	176	162	238	238	172	168	239	235	264	252	285	285	199	197	286	286	232	230	220	210
TE39	Teapa	180	176	238	238	178	168	243	239	268	264	289	285	201	199	288	282	234	218	216	210
TE40	Teapa	182	174	238	238	182	170	239	239	264	260	303	291	195	195	288	280	228	216	212	208
TE41	Teapa	180	176	238	232	194	178	251	241	274	268	289	285	203	199	290	284	232	232	214	210
TE42	Teapa	178	172	238	238	192	176	253	245	274	268	289	281	201	199	288	282	234	228	214	214
TE43	Teapa	178	174	250	238	174	178	263	235	268	252	293	285	197	197	288	278	220	220	214	204
TE44	Teapa	186	180	238	238	178	174	249	243	274	262	287	283	195	191	286	280	236	230	214	208
TE45	Teapa	184	162	238	236	174	174	253	235	262	262	299	289	197	197	286	278	228	224	216	210
TE46	Teapa	180	176	246	238	174	174	249	249	260	254	305	285	191	191	292	280	232	228	214	208
TE47	Teapa	180	174	238	234	168	168	255	243	266	262	305	305	207	197	290	282	232	226	212	198
TE48	Teapa	180	162	238	234	180	168	249	243	266	262	289	285	197	195	282	282	232	216	210	198
TE49	Teapa	174	164	238	238	176	168	245	245	268	260	289	281	205	195	292	286	230	220	214	202
TE50	Teapa	184	184	240	238	176	170	255	249	268	262	289	289	199	199	294	288	216	216	212	206
TA1	Tapijulapa	182	172	238	238	174	170	255	251	262	262	295	295	197	197	288	278	230	230	216	208
TA2	Tapijulapa	182	174	238	238	192	186	241	237	262	260	289	285	207	195	290	280	232	232	214	202
TA3	Tapijulapa	176	172	240	238	174	170	265	253	264	260	307	289	205	205	284	280	232	232	212	204
TA4	Tapijulapa	180	176	238	238	168	168	243	239	262	262	291	289	197	195	294	292	222	218	212	208
TA5	Tapijulapa	178	174	238	236	172	172	245	241	264	264	287	285	197	197	288	274	232	218	212	202
TA6	Tapijulapa	190	172	240	238	178	164	265	243	258	258	305	281	195	195	294	286	230	218	210	206
TA7	Tapijulapa	182	176	238	238	170	166	245	241	262	262	285	277	201	195	286	284	226	226	212	204
TA8	Tapijulapa	182	178	250	234	176	170	247	243	262	254	311	285	195	195	286	278	230	230	210	210
TA9	Tapijulapa	180	164	236	234	172	168	243	243	262	262	291	287	195	195	286	274	222	220	218	210
TA10	Tapijulapa	176	162	240	240	172	168	243	243	262	258	289	285	205	195	284	274	220	216	216	212
TA11	Tapijulapa	176	164	248	240	180	170	253	247	264	260	309	305	201	201	290	286	222	222	214	210
TA12	Tapijulapa	178	174	238	238	174	170	241	235	260	260	311	289	205	197	284	274	222	216	214	214
TA13	Tapijulapa	174	162	238	238	174	170	239	233	268	244	291	287	195	195	290	278	222	218	214	214
TA14	Tapijulapa	182	174	238	236	188	166	243	243	260	252	289	285	193	191	286	280	222	218	230	210
TA15	Tapijulapa	186	180	238	234	178	164	251	237	262	252	307	293	201	191	292	284	232	230	216	206
TA16	Tapijulapa	182	176	238	236	176	162	245	241	272	252	291	287	195	195	282	280	224	222	212	204
TA17	Tapijulapa	182	182	238	238	180	170	251	245	272	254	307	285	199	193	284	274	230	228	212	204
TA18	Tapijulapa	174	174	254	240	178	170	253	247	266	262	289	281	195	195	274	274	232	230	214	210
TA19	Tapijulapa	174	174	238	238	184	170	251	235	262	258	285	281	191	191	282	274	236	228	216	212
TA20	Tapijulapa	182	178	238	232	174	164	245	241	260	260	307	285	197	191	286	274	234	226	214	200
TA21	Tapijulapa	174	164	248	238	176	164	249	245	266	260	289	285	201	191	284	284	224	218	200	200
TA22	Tapijulapa	182	176	238	238	176	170	267	243	262	252	301	291	201	195	292	284	238	236	212	208
TA23	Tapijulapa	182	176	238	238	178	174	249	241	260	252	293	293	203	195	274	274	224	224	214	210
TA24	Tapijulapa	180	170	238	238	188	176	261	245	266	262	287	287	197	195	286	278	232	230	218	212
TA25	Tapijulapa	182	174	242	240	196	170	245	245	266	262	289	283	205	203	288	282	224	218	216	212
TA26	Tapijulapa	182	176	238	232	168	168	245	245	248	248	285	283	201	191	284	274	224	218	212	202
TA27	Tapijulapa	176	176	238	238	170	166	241	235	264	260	289	285	195	191	282	274	238	218	220	208
RTZ1	Río Tzendales	180	180	238	236	178	174	277	253	262	262	287	283	201	201	292	280	218	206	214	202
RTZ2	Río Tzendales	176	176	240	238	176	172	241	237	278	272	307	285	195	189	286	274	234	228	212	198
RTZ3	Río Tzendales	180	176	238	238	190	176	247	243	262	250	283	275	197	195	290	274	228	228	214	208
RTZ4	Río Tzendales	184	174	238	238	182	174	243	239	262	252	305	305	201	195	290	290	234	224	218	214
RTZ5	Río Tzendales	182	174	238	238	176	160	255	243	262	250	285	281	197	187	288	276	230	226	208	200
RTZ6	Río Tzendales	176	176	238	238	174	174	241	235	262	262	291	283	201	191	290	290	216	216	220	202
RTZ7	Río Tzendales	178	174	242	238	180	176	249	241	262	258	303	303	199	199	290	282	226	216	214	208
RTZ8	Río Tzendales	182	174	238	238	194	170	251	245	272	256	303	297	201	195	290	276	250	234	212	212
RTZ9	Río Tzendales	174	174	238	238	170	170	255	247	274	262	307	289	197	191	290	280	230	216	214	208
RTZ10	Río Tzendales	176	176	242	238	180	172	243	239	264	260	285	285	201	201	290	284	226	216	214	206
RTZ11	Río Tzendales	176	176	238	238	172	168	247	239	264	260	293	289	201	191	282	282	230	226	214	198
RTZ12	Río Tzendales	176	172	238	238	186	178	255	239	264	246	307	293	199	199	290	282	236	232	216	208
RTZ13	Río Tzendales	184	178	238	238	174	170	243	243	262	258	307	291	195	195	294	286	248	226	212	204
RTZ14	Río Tzendales	182	176	238	238	174	170	245	235	262	254	287	275	195	195	288	282	230	218	220	214
RTZ15	Río Tzendales	176	176	238	238	176	172	243	243	264	260	307	295	199	199	294	276	230	224	214	208
RTZ16	Río Tzendales	182	178	240	238	174	170	245	241	260	256	303	283	201	201	290	282	218	216	212	198
RTZ17	Río Tzendales	180	176	238	238	180	170	245	239	262	254	289	283	197	191	300	290	232	224	214	208
RTZ18	Río Tzendales	182	178	240	238	170	164	245	239	258	252	303	289	197	195	282	276	218	216	216	208
RTZ19	Río Tzendales	182	174	238	238	176	164	247	243	268	252	289	283	205	199	290	282	224	216	210	198
RTZ20	Río Tzendales	182	174	238	238	174	166	245	241	264	260	285	275	195	195	286	276	232	216	218	208
RTZ21	Río Tzendales	176	162	238	238	174	170	241	233	274	274	303	289	195	191	276	276	224	218	214	214
RTZ22	Río Tzendales	182	168	238	238	176	172	253	239	266	260	301	289	197	197	292	286	224	224	214	208
RTZ23	Río Tzendales	182	174	242	238	192	168	251	245	262	258	295	285	197	189	294	294	226	224	214	214
RTZ24	Río Tzendales	176	176	238	234	182	174	245	237	258	258	311	297	201	195	292	276	232	226	214	208
RTZ25	Río Tzendales	176	176	238	238	172	168	253	245	262	250	297	287	197	195	300	282	230	224	214	202
RTZ26	Río Tzendales	184	174	238	238	172	168	261	243	268	260	283	283	195	195	290	284	232	228	214	208
RTZ27	Río Tzendales	180	166	238	234	178	174	251	243	266	262	287	283	197	197	300	288	230	228	214	202
RTZ28	Río Tzendales	186	176	238	238	178	164	247	235	262	246	305	289	197	195	282	274	228	216	212	206
RTZ29	Río Tzendales	184	174	242	238	198	174	241	241	262	258	301	289	195	191	290	290	232	216	214	208
RTZ30	Río Tzendales	186	176	238	238	174	170	243	243	264	260	297	289	197	195	290	290	218	218	214	214
RTZ31	Río Tzendales	180	174	238	238	168	168	251	245	274	262	309	287	199	195	292	274	268	228	212	206
RTZ32	Río Tzendales	178	174	240	238	174	170	247	243	262	258	307	283	201	199	274	274	258	226	214	208
RTZ33	Río Tzendales	178	174	238	238	174	170	243	239	264	252	303	287	207	189	294	274	228	226	214	208
RTZ34	Río Tzendales	172	168	238	238	184	174	243	239	260	260	289	283	201	189	286	274	228	224	214	214
RTZ35	Río Tzendales	178	174	240	238	164	164	261	245	268	258	307	283	197	195	290	280	224	224	204	198
RTZ36	Río Tzendales	178	174	238	234	174	174	253	239	264	260	289	283	199	199	290	284	226	216	214	198
RTZ37	Río Tzendales	180	174	238	236	172	172	243	243	278	260	289	285	201	197	288	276	220	220	214	204
RTZ38	Río Tzendales	174	174	238	238	184	182	247	243	262	258	303	291	197	197	290	282	224	224	210	204
RTZ39	Río Tzendales	180	170	238	238	164	158	239	235	266	262	301	285	201	195	292	286	242	224	218	204
RTZ40	Río Tzendales	178	174	238	234	176	176	243	239	260	260	303	291	199	199	294	288	216	216	212	204
RTZ41	Río Tzendales	182	174	238	234	174	170	243	239	260	260	285	285	201	197	282	282	228	216	204	204
